# Supplementary material for: Affluenza, Psychological Well-being, and Life Satisfaction Among Doctors in Hyderabad, Pakistan: A Cross-Sectional Study
Source: Research Square preprint supplement (doi:10.21203/rs.3.rs-7054570/v1), 2025-09-05
Supplement: Supplementary file 1 [file 4c1c422c3b7212f4fc0fe2e2.docx]

**RELATIONSHIP BETWEEN AFFLUENZA, PSYCHOLOGICAL WELL BEING AND LIFE SATISFACTION AMONG DOCTORS**

**QUESTIONNAIRE**

Date: / / Serial Number:

**A. Demographic Variables**

**Age**: 25 to 35 36 to 45 46 to 55 More than 55

**Gender**: Male Female

**Education**: Graduate Masters PhD FCPS Diploma

Other (Please Specify) ___________________

**Income**: Less than Rs. 100,000 Rs. 100,000 – Rs. 200,000

More than Rs. 200,000

**Designation**: MO SMO AMS MS

Ass: Dir: Dep: Dir: Add: Dir: DDG

Ass: DHO Dep: DHO Add: DHO DHO

Administrator Consultant

Other (Please Specify) ___________________

**Working Experience**: 2 years 2 to 5 years More than 5 years

**Work Setting**: Public Hospital Private Hospital DHO Office DGHSS

Other (Please Specify) ___________________

**Working Hours**: 6 to 8 hours 8 to 12 hours More than 12 hours

**B. Study Variables**

**PART 1 – ASSESSMENT OF AFFLUENZA**

1. To what extent do you believe the pursuit of material success has influenced your career choices within the medical profession?

1 = Not at all

2 = Slightly

3 = Moderately

4 = Very much

5 = Extremely

2. How often do you find yourself comparing your financial success to that of your peers in the medical field?

1 = Never

2 = Rarely

3 = Occasionally

4 = Frequently

5 = Always

3. In your opinion, how has the pursuit of affluence affected your job satisfaction as a doctor?

1 = Significantly improved it

2 = Slightly improved it

3 = Had no impact

4 = Slightly decreased it

5 = Significantly decreased it

4. How much importance do you place on external symbols of success (e.g., luxury cars, designer clothing) in your professional life?

1 = Not important at all

2 = Slightly important

3 = Moderately important

4 = Very important

5 = Extremely important

5. How often do you feel pressure to engage in conspicuous consumption (e.g., displaying wealth through expensive possessions) as a doctor?

1 = Never

2 = Rarely

3 = Occasionally

4 = Frequently

5 = Always

6. In your opinion, does the pursuit of material success impact the quality of patient care provided by doctors?

1 = Not at all

2 = Slightly

3 = Moderately

4 = Very much

5 = Extremely

7. How strongly do you agree with the statement: "My pursuit of financial success has led to increased stress and burnout in my medical career"?

1 = Strongly disagree

2 = Disagree

3 = Neutral

4 = Agree

5 = Strongly agree

8. To what extent do you feel that materialistic values influence your healthcare decisions and priorities as a doctor?

1 = Not at all

2 = Slightly

3 = Moderately

4 = Very much

5 = Extremely

9. How satisfied are you with your current level of financial success as a doctor, considering your professional goals and expectations?

1 = Very dissatisfied

2 = Dissatisfied

3 = Neutral

4 = Satisfied

5 = Very satisfied

10. How often do you find yourself preoccupied with thoughts about your financial success while attending to your professional duties?

1 = Never

2 = Rarely

3 = Occasionally

4 = Frequently

5 = Always

**PART 2 - WARWICK-EDINBURGH MENTAL WELL-BEING SCALE (WEMWBS)**

Each of the 14 item responses are scored from 1 (none of the time) to 5 (all of the time) and a total scale score is calculated by summing the 14 individual item scores. The minimum score is 14 and the maximum is 70.

| **Statements** | **None of the time** | **Rarely** | **Some of the time** | **Often** | **All of the time** |
| --- | --- | --- | --- | --- | --- |
| I have been feeling optimistic about the future |  |  |  |  |  |
| I have been feeling useful |  |  |  |  |  |
| I have been feeling relaxed |  |  |  |  |  |
| I have been feeling interested in other people |  |  |  |  |  |
| I have had energy to spare |  |  |  |  |  |
| I have been dealing with  problems well |  |  |  |  |  |
| I have been thinking clearly |  |  |  |  |  |
| I have been feeling good about  myself |  |  |  |  |  |
| I have been feeling close to  other people |  |  |  |  |  |
| I have been feeling confident |  |  |  |  |  |
| I have been able to make up  my own mind about things |  |  |  |  |  |
| I have been feeling loved |  |  |  |  |  |
| I have been interested in new things |  |  |  |  |  |
| I have been feeling cheerful |  |  |  |  |  |
| **Scores** |  |  |  |  |  |

**PART 3 – SATISFACTION WITH LIFE SCALE**

Below are five statements that you may agree or disagree with. Using the 1-7 scale below, indicate your agreement with each item by placing the appropriate number on the line preceding that item. Please be open and honest in your responding.

• 7 - Strongly agree

• 6 - Agree

• 5 - Slightly agree

• 4 - Neither agree nor disagree

• 3 - Slightly disagree

• 2 - Disagree

• 1 - Strongly disagree

____ In most ways my life is close to my ideal.

____ The conditions of my life are excellent.

____ I am satisfied with my life.

____ So far I have gotten the important things I want in life.

____ If I could live my life over, I would change almost nothing
